# Supplementary material for: Community Fire Risk Reduction: Longitudinal Assessment for HomeSafe Fire Prevention Program in Canada
Source: MDPI journal article supplement (doi:10.3390/ijerph20146369), 2023-07-15

## Supplementary Materials

**Figure S1. Density of fire incidents over the last 5 years at the city of surrey.**

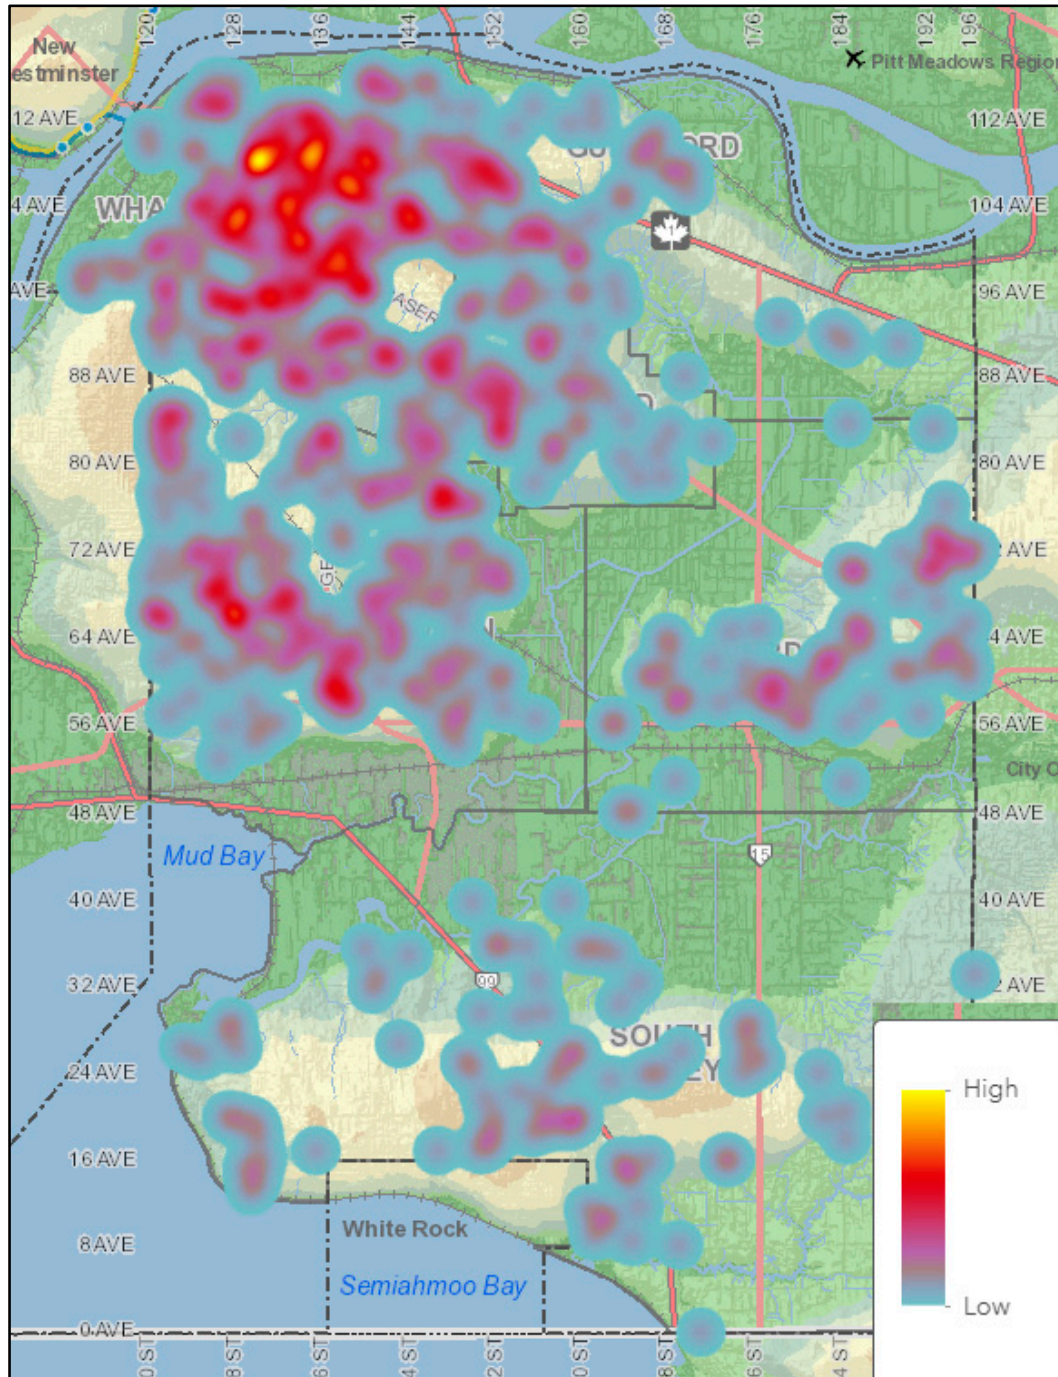

**Figure S2. Areas with higher risk of population characteristics across the city of surrey.**

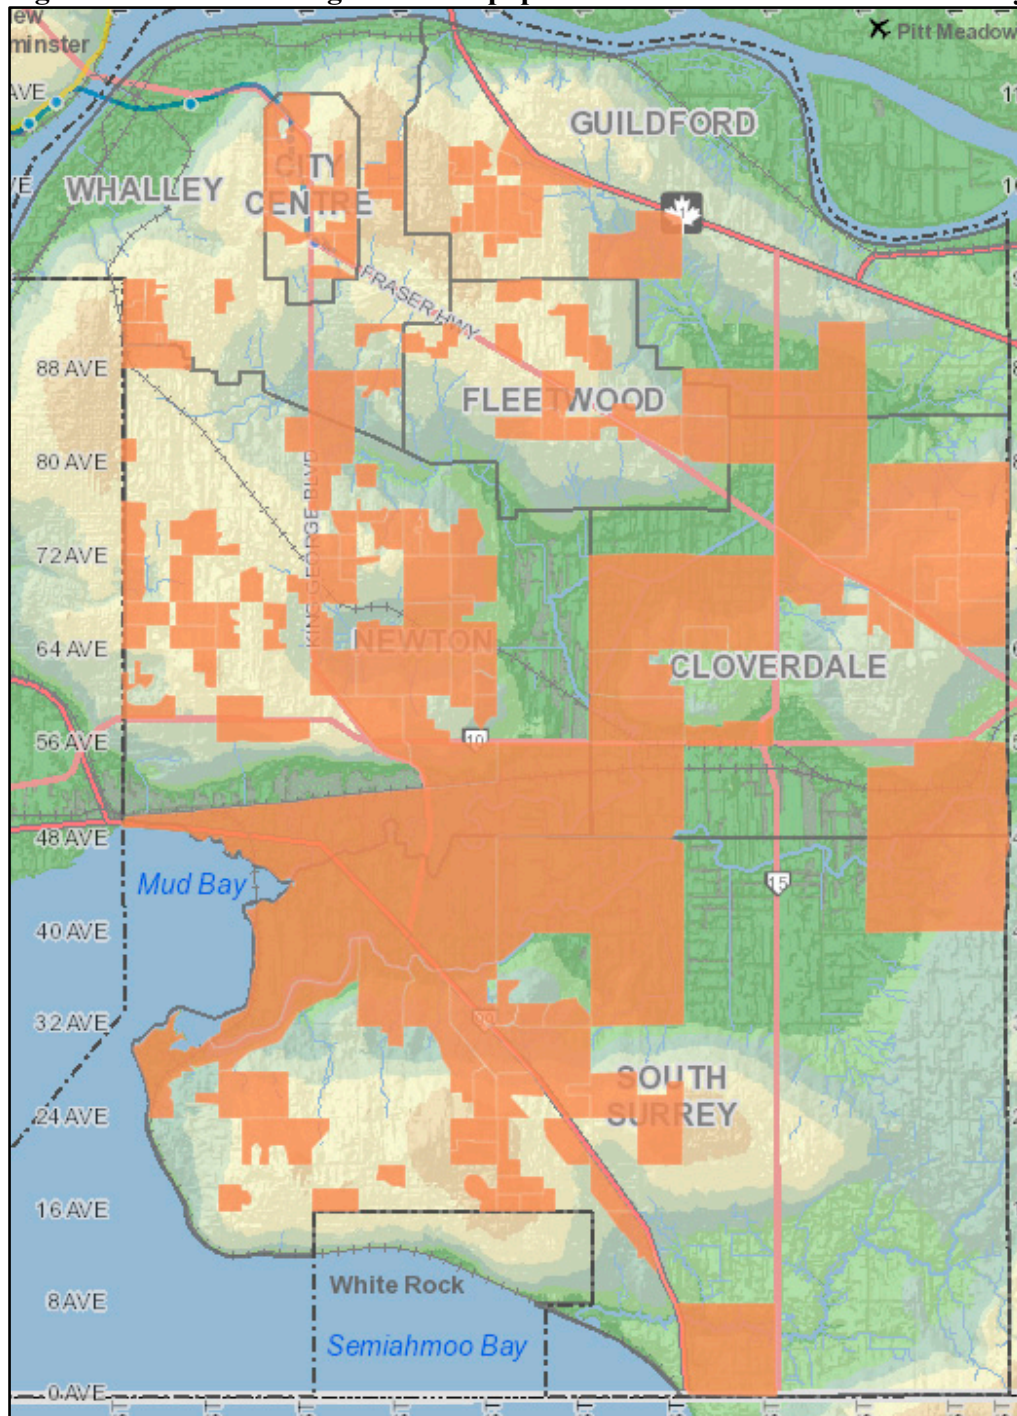

Supplement: s1 [file s1]
